# Supplementary material
Source: bioRxiv or medRxiv preprint supplement (https://www.biorxiv.org/highwire/filestream/90594/field_highwire_adjunct_files/0/293001-1.pdf)
Supplement: Supplementary file [file 293001-1.pdf]

Supplement for:

**Primate immunodeficiency virus Vpx and Vpr counteract transcriptional repression of proviruses by the HUSH complex**

Leonid Yurkovetskiy, Mehmet Hakan Guney, Kyusik Kim, Shih Lin Goh, Sean McCauley, Ann Dauphin, William Diehl, and Jeremy Luban

Including:

**Supplementary Figure Legends**

**Supplementary Figures 1, 2, and 3**

**Supplementary Table 1**

**Supplementary Figure 1. Transcriptional activation of lentivector reporter genes by *vpx* and *vpr*.**

**a**, Schematic of *vpx*<sup>+</sup> and no *vpx* versions of Lenti 1 and Lenti 2 vectors used in Figs 1 and 2. **b**, Representative live, singlet, lymphoid, GFP<sup>+</sup> flow cytometry gating strategy. **c**, Quantification of results from Fig 1b. Jurkat-*vpx* or Jurkat-*puro*<sup>R</sup> transduced with Lenti-2-*vpx*, or Lenti-2-no *vpx*, were treated with Vpx<sup>+</sup> VLPs, ΔVpx VLPs, or no VLPs, and analyzed three days later. MFI was normalized for each group of VLP treated cells to untreated samples; mean ± S.E.M., n=3 independent experiments. Significance was determined by 1-way ANOVA with Dunnett post-test comparing treated to untreated samples in each group. \*, *P*<0.016 **d**, Representative qPCR analysis of *gfp* expression after Lenti-*gfp-blasti*<sup>R</sup> cells were transduced with SIV<sub>MAC251</sub> Vpx or empty vectors (mean ± S.E.M., n=3 replicates) \*, *P*<0.02 **e**, Jurkat cells were transduced with Lenti-*gfp-blasti*<sup>R</sup> with GFP driven by EF1α or TK promoters and Blast<sup>R</sup> driven by CypA promoter. 3 days after selection cells were transduced with SIV<sub>MAC251</sub> Vpx (white) or control *puro*<sup>R</sup> (red) vectors and selected with blasticidin. Untransduced cells are shown in grey. **f**, Transactivation of Lenti-*gfp-blasti*<sup>R</sup> reporter cells by the the indicated *vpx* and *vpr* expression vectors. Red line indicates 4-fold transactivation, which was used as a cutoff for activity.

**Supplementary Figure 2. HUSH components inhibit provirus expression in primary CD4<sup>+</sup> T cells; Vpx and Vpr from multiple lentiviral species deplete FAM208A.**

**a**, Quantification of results from Fig. 2d. CD4<sup>+</sup> T cells were positively selected with magnetic beads, activated for 3 days with PHA, transduced with the indicated shRNA-*puro*<sup>R</sup> knockdown or control vectors, and selected with puromycin. Cells were then transduced with a lenti-*gfp* vector in the absence of *vpx*, and analyzed for GFP expression 7 days later (mean ± S.E.M., n=3 donors). **b**, Immunoblotting for FAM208A and Actin using lysate from Jurkat cells stably transduced with lentivectors producing the indicated Vpx proteins. **c**, Immunoblotting for

FAM208A, FLAG-Vpx, and FLAG-Vpr in Jurkat cells stably transduced with lentivectors expressing the indicated 3xFLAG tagged Vpx and Vpr constructs.

**Supplementary Figure 3. Expression from the HIV-1 LTR is activated by diverse Vpx and Vpr proteins**

**a**, J-Lat A1 cells were transduced with Lenti 1 encoding Vpx from SIV<sub>MAC251</sub>, SIV<sub>RCM02CM8081</sub>, or SIV<sub>MND25440</sub>, Vpr from SIV<sub>MND1GB1</sub>, or SIV<sub>AGMTAN1</sub>, or control no *vpx* Lenti 1. Transduced cells were selected with puromycin, activated for 24 hrs with 10 ng/ml of TNF $\alpha$ , and GFP was assessed by flow cytometry. **b**, Jurkat LTR-*gfp* cells were activated for 24 hrs with either 10 ng/ml TNF $\alpha$  or 1  $\mu$ g/ml each of soluble  $\alpha$ -CD3 and  $\alpha$ -CD28 antibodies. GFP was then assessed by flow cytometry. **c**, Jurkat LTR-*gfp* cells were transduced with Lenti 1 vector encoding Vpx from SIV<sub>MAC251</sub>, SIV<sub>RCM02CM8081</sub>, or SIV<sub>MND25440</sub>, Vpr from SIV<sub>MND1GB1</sub>, or SIV<sub>AGMTAN1</sub>, or control no *vpx* Lenti 1, selected with puromycin, and activated for 24 hrs with 10 ng/ml TNF $\alpha$ . GFP expression was assessed by flow cytometry.

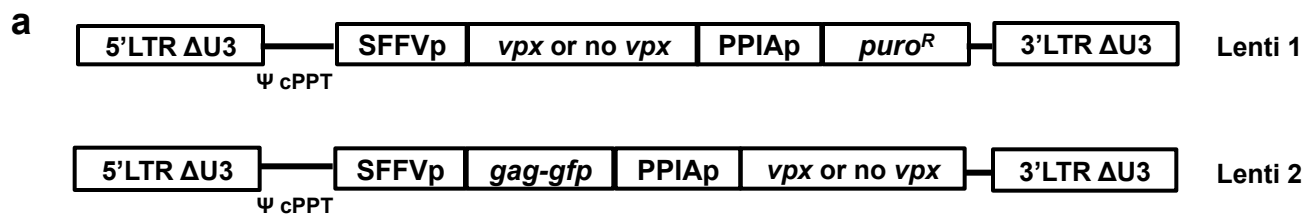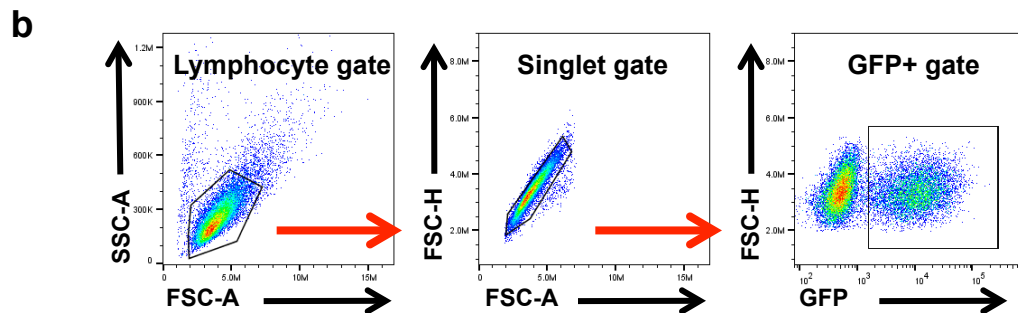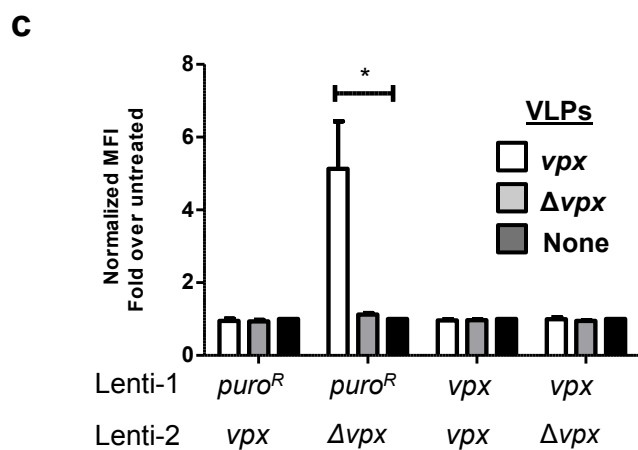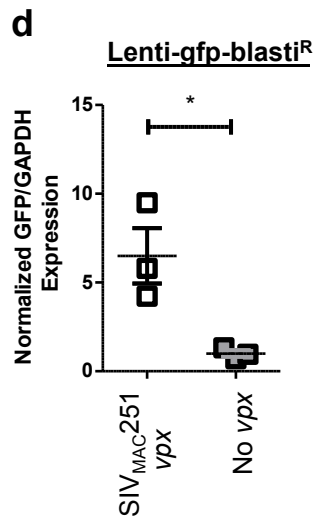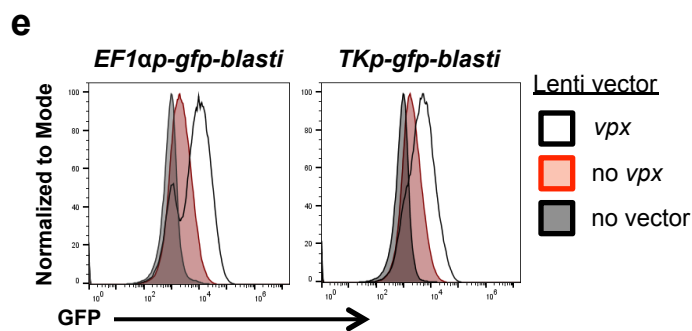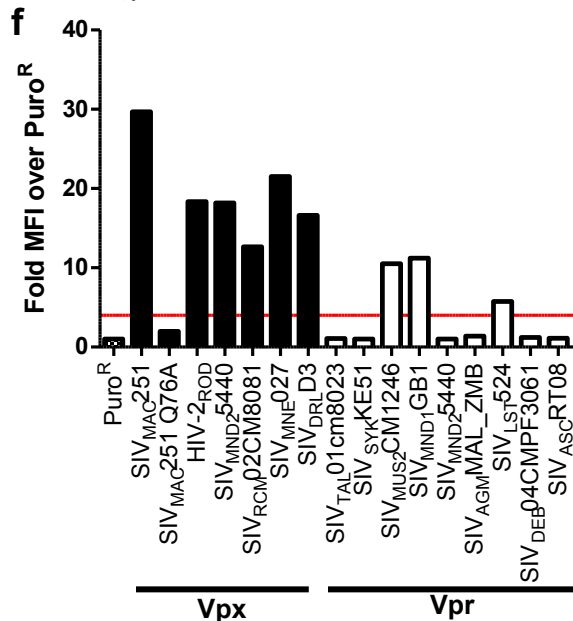

**a** Primary CD4 T cells

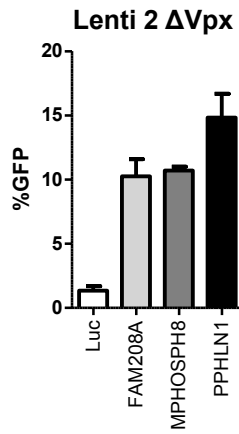

**b**

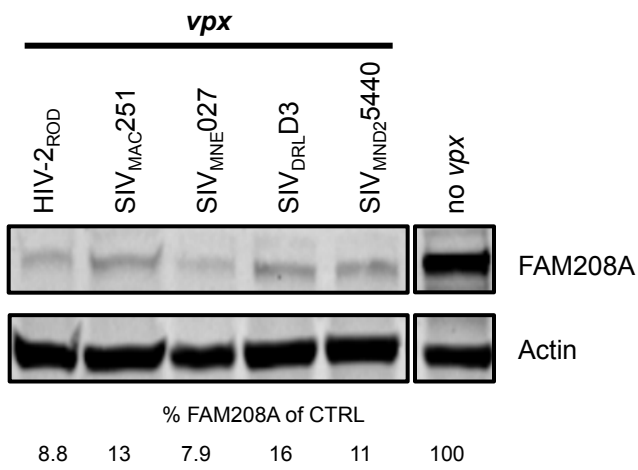

**c**

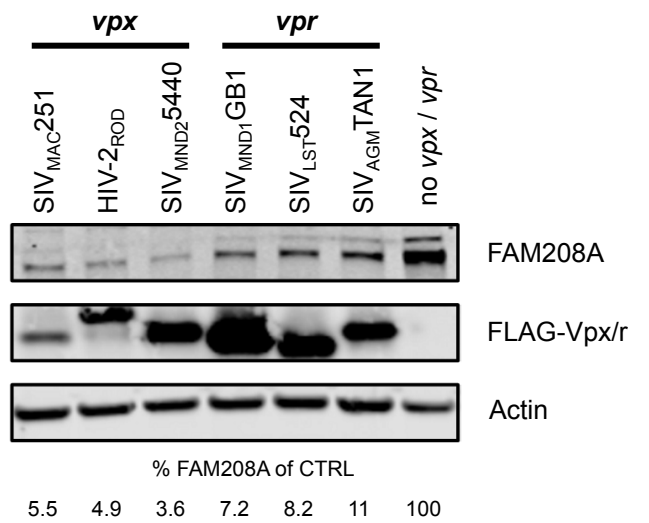

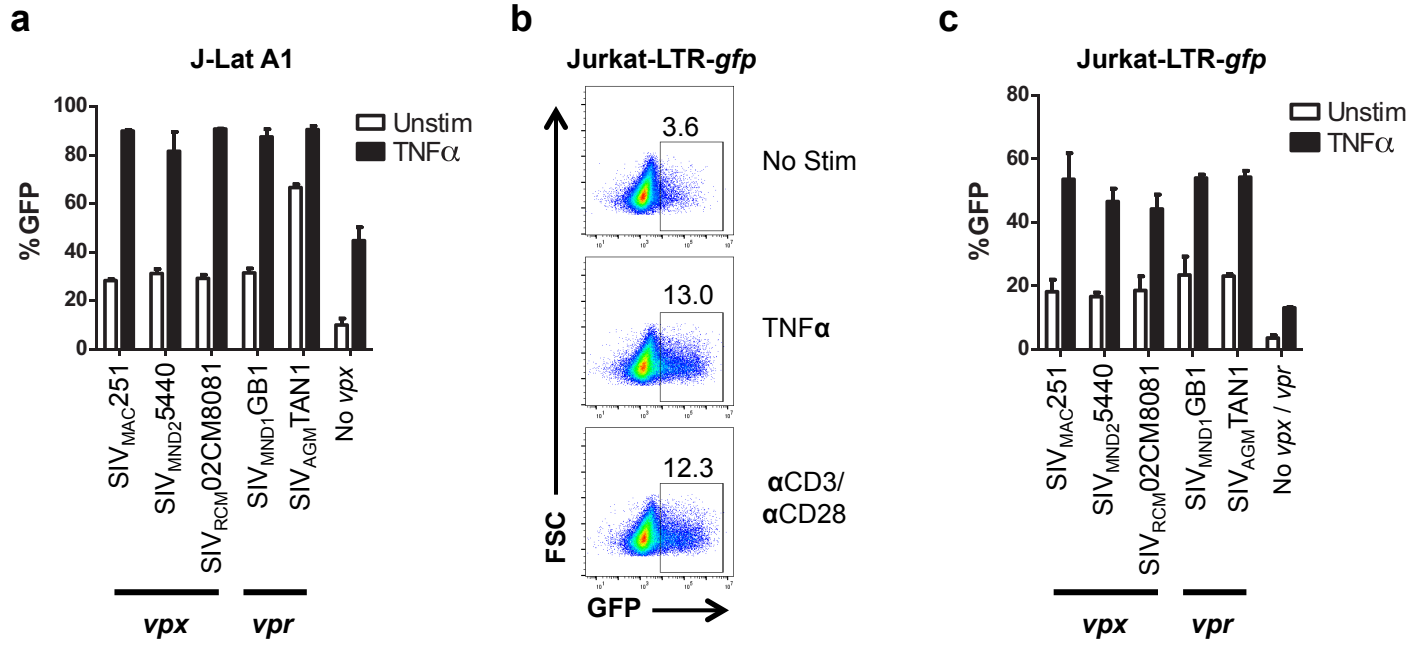

**Supplementary Table 1. Plasmids used in this study.**

| Plasmid Name                             | Purpose                                   | Notes                                                                                                                                                                                                                                                                           | Source                                       |
|------------------------------------------|-------------------------------------------|---------------------------------------------------------------------------------------------------------------------------------------------------------------------------------------------------------------------------------------------------------------------------------|----------------------------------------------|
| HIV1-ZsGreen                             | Replication competent HIV-1               | HIV-1 NL4-3 in pBluescript with flanking host sequences deleted. ZsGreen in place of <i>nef</i>                                                                                                                                                                                 | Pending<br>NIH AIDS<br>Reagent<br>Repository |
| SIV <sub>mac239</sub> SpX                | Replication competent SIV                 | Molecular clone of SIV <sub>MAC239</sub> proviral DNA                                                                                                                                                                                                                           | NIH AIDS<br>Reagent<br>#12249                |
| SIV <sub>mac239</sub> SpX<br>ΔVpx        | SIV Δvpx                                  | Molecular clone of SIV <sub>MAC239</sub> Δvpx proviral DNA                                                                                                                                                                                                                      | NIH AIDS<br>Reagent<br>#12252                |
| pGL-AN                                   | Replication competent HIV-2               | Molecular clone of HIV-2                                                                                                                                                                                                                                                        | Gift from<br>Dr. Mikako<br>Fujita            |
| pGL-St                                   | HIV-2 ΔVpx full length wt                 | Molecular clone of HIV-2 with disruption of <i>vpx</i> ORF                                                                                                                                                                                                                      | Gift from<br>Dr. Mikako<br>Fujita            |
| pMD2.G                                   | VSV G                                     | Pseudotype HIV-1 vectors with VSV Glycoprotein                                                                                                                                                                                                                                  | Addgene<br>#12259                            |
| psPAX2                                   | HIV-1 <i>gag-pol</i>                      | Encodes <i>gag</i> structural proteins and <i>pol</i> enzymes to generate virion particles                                                                                                                                                                                      | Addgene<br>#12260                            |
| SIV3+                                    | SIV <sub>MAC251</sub> <i>gag-pol/vpx</i>  | Production of SIV VLPs containing Vpx protein                                                                                                                                                                                                                                   | Addgene<br>pending                           |
| SIV3+ Δvpx                               | SIV <sub>MAC251</sub> <i>gag-pol/Δvpx</i> | Production of SIV VLPs without Vpx protein.                                                                                                                                                                                                                                     | Addgene<br>pending                           |
| pscALPS <i>gag-gfp/blasti</i>            | Lenti-gfp- <i>blasti</i>                  | SFFV promoter expresses <i>gag-gfp</i> fusion with CypA promoter driving blasticidin resistance gene                                                                                                                                                                            | Addgene<br>pending                           |
| pscALPS <i>gag-gfp/vpx</i>               | Lenti-gfp- <i>vpx</i>                     | SFFV promoter expresses <i>gag-gfp</i> fusion with CypA promoter driving expression of SIV <sub>MAC251</sub> <i>vpx</i>                                                                                                                                                         | Addgene<br>pending                           |
| pscALPS <i>gag-gfp/Δvpx</i>              | Lenti-gfp-Δvpx                            | SFFV promoter expresses <i>gag-gfp</i> fusion with no ORF after CypA promoter                                                                                                                                                                                                   | Addgene<br>pending                           |
| pecALPS <i>gag-gfp/blasti</i>            | Lenti-gfp- <i>blasti</i>                  | EIF1a promoter expresses <i>gag-gfp</i> fusion and CypA promoter expresses blasticidin resistance gene                                                                                                                                                                          | Addgene<br>pending                           |
| pkcALPS- <i>gag-gfp/blasti</i>           | Lenti-gfp- <i>blasti</i>                  | TK promoter expresses <i>gag-gfp</i> fusion and CypA promoter expresses blasticidin resistance gene                                                                                                                                                                             | Addgene<br>pending                           |
| HIV-1 LTR-gfp                            | HIV-1 LTR-gfp                             | HIV-1 LTR driven reporter vector that retains complete LTRs, <i>tat</i> , and <i>rev</i> , but has a frameshift mutation in <i>env</i> , an <i>ngfr</i> reporter gene in place of <i>nef</i> , and <i>gfp</i> in place of <i>gag</i> , <i>pol</i> , <i>vif</i> , and <i>vpr</i> | Addgene<br>pending                           |
| pscALPS-SIV <sub>MAC251</sub> <i>vpx</i> | Lentivector expressing <i>vpx</i>         | Encodes codon optimized 3xFLAG-Vpx <sub>MAC251</sub> and puromycin resistance protein                                                                                                                                                                                           | Addgene<br>pending                           |
| pscALPS SIV <sub>MND2</sub> <i>vpx</i>   | Lentivector expressing <i>vpx</i>         | Encodes codon optimized 3xFLAG-SIV <sub>MND2</sub> Vpx (AY159322) and puromycin resistance protein                                                                                                                                                                              | Addgene<br>pending                           |
| pscALPS-SIV <sub>RCM</sub> <i>vpx</i>    | Lentivector expressing <i>vpx</i>         | Encodes codon optimized 3xFLAG-SIV <sub>RCM</sub> Vpx (AF349680) and puromycin resistance protein                                                                                                                                                                               | Addgene<br>pending                           |
| pscALPS-SIV <sub>MNE</sub> <i>vpx</i>    | Lentivector expressing <i>vpx</i>         | Encodes codon optimized 3xFLAG-SIV <sub>MNE</sub> Vpx (U79412) and puromycin resistance protein                                                                                                                                                                                 | Addgene<br>pending                           |

|                                                       |                                      |                                                                                                                                           |                               |
|-------------------------------------------------------|--------------------------------------|-------------------------------------------------------------------------------------------------------------------------------------------|-------------------------------|
| pscALPS-SIV <sub>DRL</sub><br><i>vpx</i>              | Lentivector<br>expressing <i>vpx</i> | Encodes codon optimized 3xFLAG-SIV <sub>DRL</sub> Vpx (KM378563) and puromycin resistance protein                                         | Addgene<br>Addgene<br>pending |
| pscALPS-SIV <sub>AGI</sub><br><i>vpx</i>              | Lentivector<br>expressing <i>vpx</i> | Encodes codon optimized 3xFLAG-SIV <sub>AGI</sub> Vpx (HM803690) and puromycin resistance protein                                         | Addgene<br>pending            |
| pscALPS-<br>HIV2 <sub>ROD</sub> <i>vpx</i>            | Lentivector<br>expressing <i>vpx</i> | Encodes codon optimized 3xFLAG-HIV2 <sub>ROD</sub> Vpx (M15390) and puromycin resistance protein                                          | Addgene<br>pending            |
| pscALPS-<br>SIV <sub>MND1</sub> <i>vpr</i>            | Lentivector<br>expressing <i>vpx</i> | Encodes codon optimized 3xFLAG-SIV <sub>MND1</sub> Vpr (M27470) and puromycin resistance protein                                          | Addgene<br>pending            |
| pscALPS-SIV <sub>LST</sub><br><i>vpr</i>              | Lentivector<br>expressing <i>vpx</i> | Encodes codon optimized 3xFLAG-SIV <sub>LST</sub> Vpr (AF188116) and puromycin resistance protein                                         | Addgene<br>pending            |
| pscALPS-<br>SIV <sub>AGM</sub> TAN1 <i>vpr</i>        | Lentivector<br>expressing <i>vpx</i> | Encodes codon optimized 3xFLAG-SIV <sub>AGM</sub> Vpr (TAN1) (U58991) with repaired premature stop codon and puromycin resistance protein | Addgene<br>pending            |
| pscALPS-SIV <sub>TAL</sub><br><i>vpx</i>              | Lentivector<br>expressing <i>vpx</i> | Encodes codon optimized 3xFLAG-SIV <sub>TAL</sub> Vpr (AM182197) and puromycin resistance protein                                         | Addgene<br>pending            |
| pscALPS-SIV <sub>SYK</sub><br><i>vpx</i>              | Lentivector<br>expressing <i>vpx</i> | Encodes codon optimized 3xFLAG-SIV <sub>SYK</sub> Vpr (L06042) and puromycin resistance protein                                           | Addgene<br>pending            |
| pscALPS-SIV <sub>SAB</sub><br><i>vpx</i>              | Lentivector<br>expressing <i>vpx</i> | Encodes codon optimized 3xFLAG-SIV <sub>SAB</sub> Vpr (U04005) and puromycin resistance protein                                           | Addgene<br>pending            |
| pscALPS-SIV <sub>DEB</sub><br><i>vpx</i>              | Lentivector<br>expressing <i>vpx</i> | Encodes codon optimized 3xFLAG-SIV <sub>DEB</sub> Vpr (FJ919724) and puromycin resistance protein                                         | Addgene<br>pending            |
| pscALPS-SIV <sub>ASC</sub><br><i>vpx</i>              | Lentivector<br>expressing <i>vpx</i> | Encodes codon optimized 3xFLAG-SIV <sub>ASC</sub> Vpr (KJ461715) and puromycin resistance protein                                         | Addgene<br>pending            |
| pscALPS-<br>SIV <sub>AGM</sub> VER9063<br><i>vpr</i>  | Lentivector<br>expressing <i>vpx</i> | Encodes codon optimized 3xFLAG-SIV <sub>AGM</sub> Vpr (Ver 9063) (L40990) and Puro resistance marker                                      | Addgene<br>pending            |
| pscALPS-<br>SIV <sub>AGM</sub> VERAGM<br>3 <i>vpr</i> | Lentivector<br>expressing <i>vpx</i> | Encodes codon optimized 3xFLAG-SIV <sub>AGM</sub> Vpr (Ver AGM3) (M30931) and puromycin resistance protein                                | Addgene<br>pending            |
| pscALPS-SIV <sub>GRV</sub><br><i>vpr</i>              | Lentivector<br>expressing <i>vpx</i> | Encodes codon optimized 3xFLAG-SIV <sub>GRV</sub> Vpr (M66437) and puromycin resistance protein                                           | Addgene<br>pending            |
| pscALPS-<br>SIV <sub>AGM</sub> MAL <i>vpr</i>         | Lentivector<br>expressing <i>vpx</i> | Encodes codon optimized 3xFLAG-SIV <sub>AGM</sub> Vpr (MAL_ZMB) (LC114462) and puromycin resistance protein                               | Addgene<br>pending            |
| pscALPS-SIV <sub>DEN</sub><br><i>vpr</i>              | Lentivector<br>expressing <i>vpx</i> | Encodes codon optimized 3xFLAG SIV <sub>DEN</sub> Vpr (AJ580407) and puromycin resistance protein                                         | Addgene<br>pending            |
| pscALPS-<br>SIV <sub>GSN</sub> CN71 <i>vpr</i>        | Lentivector<br>expressing <i>vpx</i> | Encodes codon optimized 3xFLAG SIV <sub>GSN-CN71</sub> Vpr (AF468658) and puromycin resistance protein                                    | Addgene<br>pending            |
| pscALPS-<br>SIV <sub>GSN</sub> CN166<br><i>vpr</i>    | Lentivector<br>expressing <i>vpx</i> | Encodes codon optimized 3xFLAG SIV <sub>GSN-CN166</sub> Vpr (AF468659) and puromycin resistance protein                                   | Addgene<br>pending            |
| pscALPS-SIV <sub>SUN</sub><br><i>vpr</i>              | Lentivector<br>expressing <i>vpx</i> | Encodes codon optimized 3xFLAG-SIV <sub>SUN</sub> Vpr (AF131870) and puromycin resistance protein                                         | Addgene<br>pending            |
| pscALPS-<br>SIV <sub>CPZ</sub> TAN3 <i>vpr</i>        | Lentivector<br>expressing <i>vpx</i> | Encodes codon optimized 3xFLAG-SIV <sub>CPZ-TAN3</sub> Vpr (DQ374658) and puromycin resistance protein                                    | Addgene<br>pending            |
| pscALPS-<br>SIV <sub>CPZ</sub> LB7 <i>vpr</i>         | Lentivector<br>expressing <i>vpx</i> | Encodes codon optimized 3xFLAG-SIV <sub>CPZ-LB7</sub> Vpr (DQ373064) and puromycin resistance protein                                     | Addgene<br>pending            |
| pscALPS-SIV <sub>GOR</sub><br><i>-vpr</i>             | Lentivector<br>expressing <i>vpx</i> | Encodes codon optimized 3xFLAG-SIV <sub>GOR</sub> Vpr (FJ424871) and puromycin resistance protein                                         | Addgene<br>pending            |



|                                               |                                   |                                                                                                                                                       |                 |
|-----------------------------------------------|-----------------------------------|-------------------------------------------------------------------------------------------------------------------------------------------------------|-----------------|
| pscALPS-HIV-1 Group O- <i>vpr</i>             | Lentivector expressing <i>vpx</i> | Encodes codon optimized 3xFLAG-HIV1 Group O Vpr (L20571) and puromycin resistance protein                                                             | Addgene pending |
| pscALPS-HIV-1 Group P- <i>vpr</i>             | Lentivector expressing <i>vpx</i> | Encodes codon optimized 3xFLAG-HIV1 Group P Vpr (HQ179987) and puromycin resistance protein                                                           | Addgene pending |
| pscALPS-SIV <sub>RCM</sub> - <i>vpr</i>       | Lentivector expressing <i>vpx</i> | Encodes codon optimized 3xFLAG-SIV <sub>RCM</sub> Vpr (HM803689) and puromycin resistance protein                                                     | Addgene pending |
| pscALPS-SIV <sub>WRC</sub> - <i>vpr</i>       | Lentivector expressing <i>vpx</i> | Encodes codon optimized 3xFLAG-SIV <sub>WRC</sub> Vpr (AM713177) and puromycin resistance protein                                                     | Addgene pending |
| pscALPS-SIV <sub>MUS21246</sub> - <i>vpr</i>  | Lentivector expressing <i>vpx</i> | Encodes codon optimized 3xFLAG-SIV <sub>MUS21246</sub> Vpr (EF070329) and puromycin resistance protein                                                | Addgene pending |
| pcDNA3.1 FLAG-SIV <sub>MAC251</sub> -Vpx      | Expression plasmid                | Encodes codon optimized FLAG tagged SIV <sub>MAC251</sub> -Vpx                                                                                        | Addgene pending |
| pcDNA3.1 FLAG-SIV <sub>MAC251</sub> -Vpx-Q76A | Expression plasmid                | Encodes codon optimized FLAG tagged SIV <sub>MAC251</sub> -Vpx-Q76A mutant                                                                            | Addgene pending |
| pcDNA3.1 FLAG-SIV <sub>RCM</sub> -Vpx         | Expression plasmid                | Encodes codon optimized FLAG tagged SIV <sub>RCM</sub> -Vpx                                                                                           | Addgene pending |
| pcDNA3.1 HA-FAM208A                           | Expression plasmid                | Encodes codon optimized HA tagged FAM208A                                                                                                             | Addgene pending |
| pAPM-D4-miR30-L1221                           | Lentivector luciferase knockdown  | SFFV promoter expressing puromycin resistance protein and miR30-shRNA target site: 5'-CTTGTCGATGAGAGCGTTTGT-3'; negative control for other knockdowns | Addgene pending |
| pAPM-D4 miR30-HDAC1 ts1                       | Lentivector HDAC1 knockdown       | SFFV promoter expressing puromycin resistance protein and miR30-shRNA target site: 5'-TATGAGTCATGCGGATTCG-3'                                          | Addgene pending |
| pAPM-D4 miR30-HDAC1 ts2                       | Lentivector HDAC1 knockdown       | SFFV promoter expressing puromycin resistance protein and miR30-shRNA target site: 5'-TAAGAACGGGAAGAATGGG-3'                                          | Addgene pending |
| pAPM-D4 miR30-HDAC1 ts3                       | Lentivector HDAC1 knockdown       | SFFV promoter expressing puromycin resistance protein and miR30-shRNA target site: 5'-TTAATGTAGTCATCGCTGT-3'                                          | Addgene pending |
| pAPM-D4 miR30-AGO1 ts1                        | Lentivector AGO1 knockdown        | SFFV promoter expressing puromycin resistance protein and miR30-shRNA target site: 5'-TTCTGCTTCAAATACTGTG-3'                                          | Addgene pending |
| pAPM-D4 miR30-AGO1 ts2                        | Lentivector AGO1 knockdown        | SFFV promoter expressing puromycin resistance protein and miR30-shRNA target site: 5'-TGATATCAGAGATTTCTGG-3'                                          | Addgene pending |
| pAPM-D4 miR30-AGO1 ts3                        | Lentivector AGO1 knockdown        | SFFV promoter expressing puromycin resistance protein and miR30-shRNA target site: 5'-TTGACATTGATCTTGAGGC-3'                                          | Addgene pending |
| pAPM-D4 miR30-AGO2 ts1                        | Lentivector AGO2 knockdown        | SFFV promoter expressing puromycin resistance protein and miR30-shRNA target site: 5'-TAATACATCTTTGTCCTGC-3'                                          | Addgene pending |
| pAPM-D4 miR30-AGO2 ts2                        | Lentivector AGO2 knockdown        | SFFV promoter expressing puromycin resistance protein and miR30-shRNA target site: 5'-TCATCTGCACGCACTGCGT-3'                                          | Addgene pending |
| pAPM-D4 miR30-AGO2 ts3                        | Lentivector AGO2 knockdown        | SFFV promoter expressing puromycin resistance protein and miR30-shRNA target site: 5'-TTGCTAATCTCTTCTTGCC-3'                                          | Addgene pending |
| pAPM-D4 miR30-AGO3 ts1                        | Lentivector AGO3 knockdown        | SFFV promoter expressing puromycin resistance protein and miR30-shRNA target site: 5'-TGAATTGAACACATTGTGT-3'                                          | Addgene pending |
| pAPM-D4 miR30-AGO3 ts2                        | Lentivector AGO3 knockdown        | SFFV promoter expressing puromycin resistance protein and miR30-shRNA target site: 5'-TCTGAACTACAATGTAGGT-3'                                          | Addgene pending |

|                                   |                                      |                                                                                                                 |                    |
|-----------------------------------|--------------------------------------|-----------------------------------------------------------------------------------------------------------------|--------------------|
| pAPM-D4<br>miR30-AGO3 ts3         | Lentivector AGO3<br>knockdown        | SFFV promoter expressing puromycin resistance protein and<br>miR30-shRNA target site: 5'-TAGCTTCTTGATACATCGT-3' | Addgene<br>pending |
| pAPM-D4<br>miR30-SETDB1<br>ts1    | Lentivector<br>SETDB1<br>knockdown   | SFFV promoter expressing puromycin resistance protein and<br>miR30-shRNA target site: 5'-TTCGCATGCTGACTATCAG-3' | Addgene<br>pending |
| pAPM-D4<br>miR30-SETDB1<br>ts2    | Lentivector<br>SETDB1<br>knockdown   | SFFV promoter expressing puromycin resistance protein and<br>miR30-shRNA target site: 5'-ACACAATCCATCTTCTCCA-3' | Addgene<br>pending |
| pAPM-D4<br>miR30-SETDB1<br>ts3    | Lentivector<br>SETDB1<br>knockdown   | SFFV promoter expressing puromycin resistance protein and<br>miR30-shRNA target site: 5'-TTGTTGTCAAATTTACCT-3'  | Addgene<br>pending |
| pAPM-D4<br>miR30-TRIM28<br>ts1    | Lentivector<br>TRIM28<br>knockdown   | SFFV promoter expressing puromycin resistance protein and<br>miR30-shRNA target site: 5'-AAGGTTGTAGTCCTCAGT-3'  | Addgene<br>pending |
| pAPM-D4<br>miR30-TRIM28<br>ts2    | Lentivector<br>TRIM28<br>knockdown   | SFFV promoter expressing puromycin resistance protein and<br>miR30-shRNA target site: 5'-TCAATAACAATAAGGTTGT-3' | Addgene<br>pending |
| pAPM-D4<br>miR30-TRIM28<br>ts3    | Lentivector<br>TRIM28<br>knockdown   | SFFV promoter expressing puromycin resistance protein and<br>miR30-shRNA target site: 5'-TGAGTAGGATCATCTCCT-3'  | Addgene<br>pending |
| pAPM-D4<br>miR30-DNMT3a<br>ts1    | Lentivector<br>DNMT3a<br>knockdown   | SFFV promoter expressing puromycin resistance protein and<br>miR30-shRNA target site: 5'-TAATCTCCTTGACCTTGGG-3' | Addgene<br>pending |
| pAPM-D4<br>miR30-DNMT3a<br>ts2    | Lentivector<br>DNMT3a<br>knockdown   | SFFV promoter expressing puromycin resistance protein and<br>miR30-shRNA target site: 5'-TATCATTCACAGTGGATGC-3' | Addgene<br>pending |
| pAPM-D4<br>miR30-DNMT3a<br>ts3    | Lentivector<br>DNMT3a<br>knockdown   | SFFV promoter expressing puromycin resistance protein and<br>miR30-shRNA target site: 5'-AGAACTCAAAGAAGAGCCG-3' | Addgene<br>pending |
| pAPM-D4<br>miR30-PIWIL2<br>ts1    | Lentivector<br>PIWIL2<br>knockdown   | SFFV promoter expressing puromycin resistance protein and<br>miR30-shRNA target site: 5'-CGAACATTGACAACCTGGG-3' | Addgene<br>pending |
| pAPM-D4<br>miR30-PIWIL2<br>ts2    | Lentivector<br>PIWIL2<br>knockdown   | SFFV promoter expressing puromycin resistance protein and<br>miR30-shRNA target site: 5'-AGCAGACAAGCCTCGACCT-3' | Addgene<br>pending |
| pAPM-D4<br>miR30-PIWIL2<br>ts3    | Lentivector<br>PIWIL2<br>knockdown   | SFFV promoter expressing puromycin resistance protein and<br>miR30-shRNA target site: 5'-AGATTAGTACTGATTTTCT-3' | Addgene<br>pending |
| pAPM-D4<br>miR30-FAM208A<br>ts1   | Lentivector<br>FAM208A<br>knockdown  | SFFV promoter expressing puromycin resistance protein and<br>miR30-shRNA target site: 5'-TTCTTCTACTGGTTCCCGG-3' | Addgene<br>pending |
| pAPM-D4<br>miR30-FAM208A<br>ts2   | Lentivector<br>FAM208A<br>knockdown  | SFFV promoter expressing puromycin resistance protein and<br>miR30-shRNA target site: 5'-TGAATTGCTGTTCTCTCCT-3' | Addgene<br>pending |
| pAPM-D4<br>miR30-FAM208A<br>ts3   | Lentivector<br>FAM208A<br>knockdown  | SFFV promoter expressing puromycin resistance protein and<br>miR30-shRNA target site: 5'-ATCTTAGCACCAGAATCGT-3' | Addgene<br>pending |
| pAPM-D4<br>miR30-<br>MPHOSPH8 ts1 | Lentivector<br>MPHOSPH8<br>knockdown | SFFV promoter expressing puromycin resistance protein and<br>miR30-shRNA target site: 5'-AAATCTCTTATTTACCCT-3'  | Addgene<br>pending |

|                                   |                                      |                                                                                                                        |                    |
|-----------------------------------|--------------------------------------|------------------------------------------------------------------------------------------------------------------------|--------------------|
| pAPM-D4<br>miR30-<br>MPHOSPH8 ts2 | Lentivector<br>MPHOSPH8<br>knockdown | SFFV promoter expressing puromycin resistance protein and<br>miR30-shRNA target site: 5'-TTGCTTCTGTCTTGATTCC-3'        | Addgene<br>pending |
| pAPM-D4<br>miR30-<br>MPHOSPH8 ts3 | Lentivector<br>MPHOSPH8<br>knockdown | SFFV promoter expressing puromycin resistance protein and<br>miR30-shRNA target site: 5'-TTCTCTTCTCTGCTGTCGG-3'        | Addgene<br>pending |
| pAPM-D4<br>miR30-PPHLN1<br>ts1    | Lentivector<br>PPHLN1<br>knockdown   | SFFV promoter expressing puromycin resistance protein and<br>miR30-shRNA target site: 5'-TCATCTGATTTCTCTAGCT-3'        | Addgene<br>pending |
| pAPM-D4<br>miR30-PPHLN1<br>ts2    | Lentivector<br>PPHLN1<br>knockdown   | SFFV promoter expressing puromycin resistance protein and<br>miR30-shRNA target site: 5'-TTCATATTCATATCGTCCC-3'        | Addgene<br>pending |
| pAPM-D4<br>miR30-PPHLN1<br>ts3    | Lentivector<br>PPHLN1<br>knockdown   | SFFV promoter expressing puromycin resistance protein and<br>miR30-shRNA target site: 5'-TGAGTTCTTCAACACACCG-3'        | Addgene<br>pending |
| pAPM-D4<br>miR30-SUV39h1<br>ts1   | Lentivector<br>SUV39h1<br>knockdown  | SFFV promoter expressing puromycin resistance protein and<br>miR30-shRNA target site: 5'-TGAGGATACGCACACACTT-3'        | Addgene<br>pending |
| pAPM-D4<br>miR30-SUV39h1<br>ts2   | Lentivector<br>SUV39h1<br>knockdown  | SFFV promoter expressing puromycin resistance protein and<br>miR30-shRNA target site: 5'-AGAGCAGGTAGGAGCAGGT-3'        | Addgene<br>pending |
| pAPM-D4<br>miR30-SUV39h1<br>ts3   | Lentivector<br>SUV39h1<br>knockdown  | SFFV promoter expressing puromycin resistance protein and<br>miR30-shRNA target site: 5'-CATTCTCTACAGTGATGCG-3'        | Addgene<br>pending |
| pAPM-D4<br>miR30-SUV39h2<br>ts1   | Lentivector<br>SUV39h2<br>knockdown  | SFFV promoter expressing puromycin resistance protein and<br>miR30-shRNA target site: 5'-TCATCAGACTCATAGTCCA-3'        | Addgene<br>pending |
| pAPM-D4<br>miR30-SUV39h2<br>ts2   | Lentivector<br>SUV39h2<br>knockdown  | SFFV promoter expressing puromycin resistance protein and<br>miR30-shRNA target site: 5'-TAAATTTCTTTATCATTGA-3'        | Addgene<br>pending |
| pAPM-D4<br>miR30-SUV39h2<br>ts3   | Lentivector<br>SUV39h2<br>knockdown  | SFFV promoter expressing puromycin resistance protein and<br>miR30-shRNA target site: 5'-ACATTATCAGCTTAACGCT-3'        | Addgene<br>pending |
| pAPM-D4<br>miR30-MORC2<br>ts1     | Lentivector<br>SUV39h2<br>knockdown  | SFFV promoter expressing puromycin resistance protein and<br>miR30-shRNA target site: 5'-TGAGATTGAAGATGATCAC-3'        | Addgene<br>pending |
| pAPM-D4<br>miR30-MORC2<br>ts2     | Lentivector<br>MORC2<br>knockdown    | SFFV promoter expressing puromycin resistance protein and<br>miR30-shRNA target site: 5'-TTTTCCACAGAACTCAGCT-3'        | Addgene<br>pending |
| pAPM-D4<br>miR30-MORC2<br>ts3     | Lentivector<br>MORC2<br>knockdown    | SFFV promoter expressing puromycin resistance protein and<br>miR30-shRNA target site: 5'-TGTCTGTGACAGGTTCCCG-3'        | Addgene<br>pending |
| pAPM-miR30-<br>DCAF1              | Lentivector<br>DCAF1<br>knockdown    | SFFV promoter expressing puromycin resistance protein and<br>miR30-shRNA target site: 5'-AGCACTTCAGATTATCATCAAT-<br>3' | Addgene<br>pending |
